# Supplementary material for: Coordination polymers of biphenyl-2,4,2′,4′-tetracarboxylic acid—synthesis, structures and adsorption properties
Source: Royal Society of Chemistry journal article supplement (doi:10.1039/b916984a), 2010-01-01
Supplement: b916984a.pdf [file b916984a.pdf]

# Support materials

## Coordination Polymers of Biphenyl-2,4,2',4'-Tetracarboxylic Acid—Synthesis, Structures and Adsorption Properties

Juan Jia<sup>a</sup>, Min Shao<sup>b</sup>, Tiantian, Jia<sup>a</sup>, Shourong Zhu<sup>a\*</sup>, Yongmei<sup>a</sup> Zhao, Feifei Xing<sup>a</sup> and  
Mingxing Li<sup>a</sup>

<sup>a</sup> *Department of Chemistry, College of Sciences, Shanghai University, Shanghai 200444, China*

<sup>b</sup> *Instrumental Analysis and Research Center, Shanghai University, Shanghai 200444, China*

email: [shourongzhu@shu.edu.cn](mailto:shourongzhu@shu.edu.cn); Fax : +86-21-60947570 ; Tel : +86-21-66132403

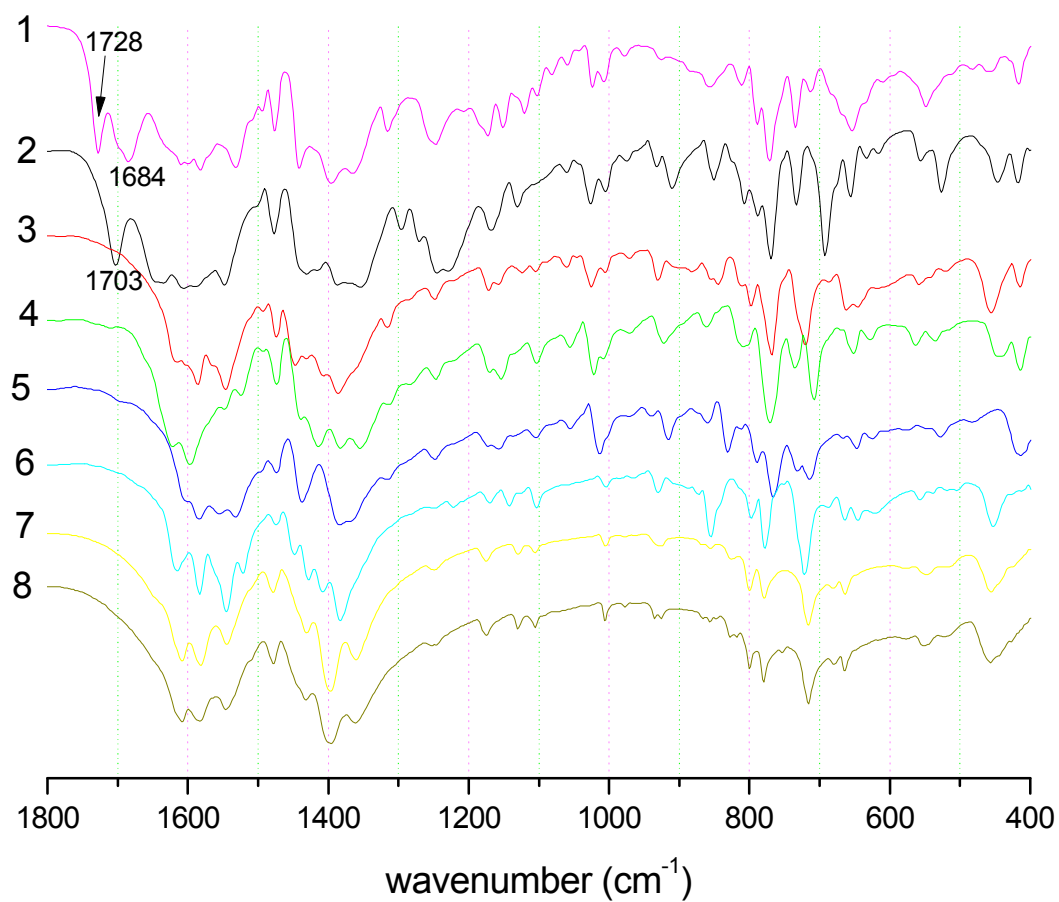

Fig. s1. IR spectra of complex 1~8

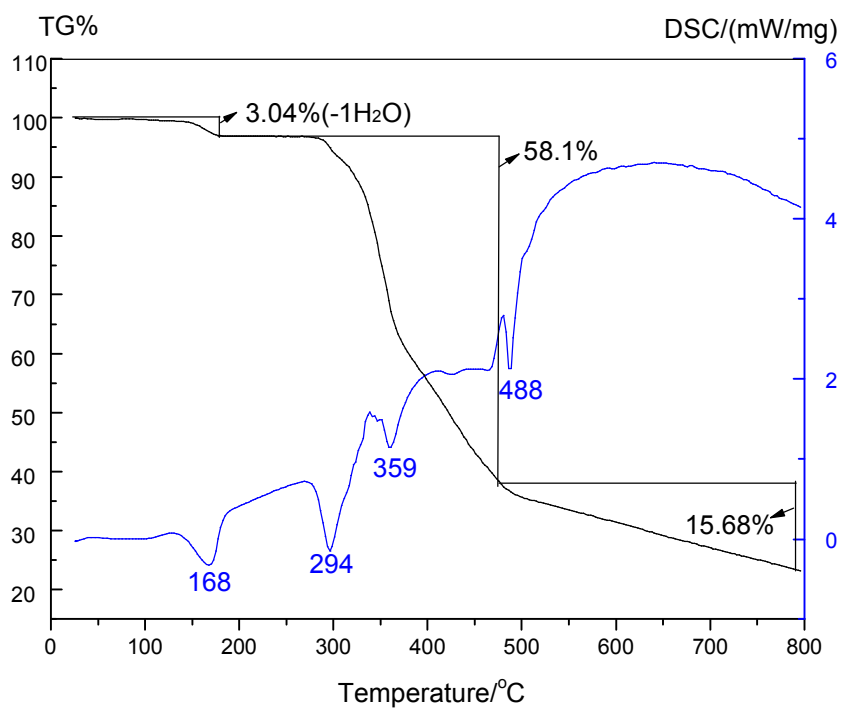

Fig. s2. TG of  $[\text{Zn}(\text{2,4-H}_2\text{bptc})(\text{2,2'-bipy})\cdot\text{H}_2\text{O}]_n$  (1)

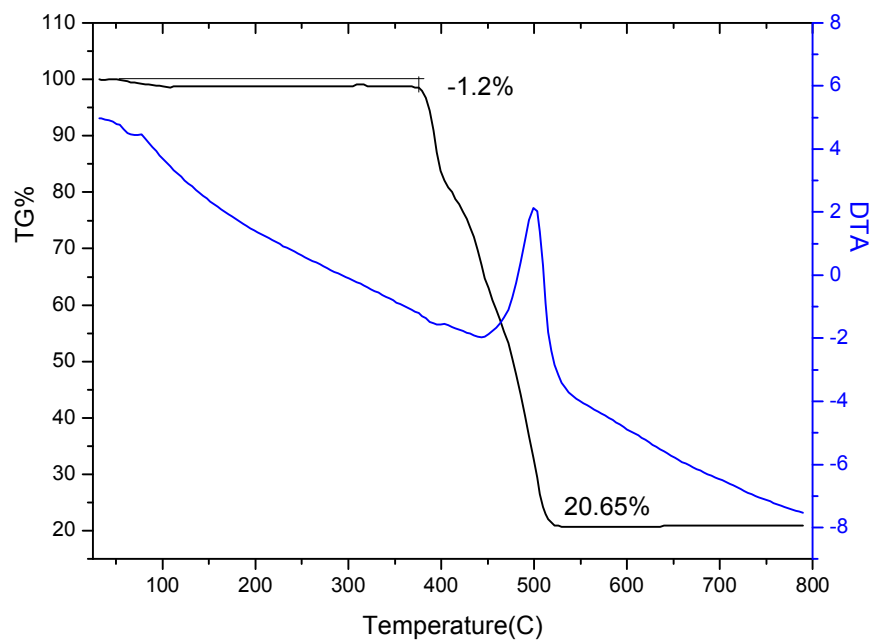

Fig. s3. TG of  $\{[\text{Zn}_3(2,4\text{-Hbptc})_2(2,2'\text{-bpy})_2]\cdot 2\text{H}_2\text{O}\}_n$  (**2**)

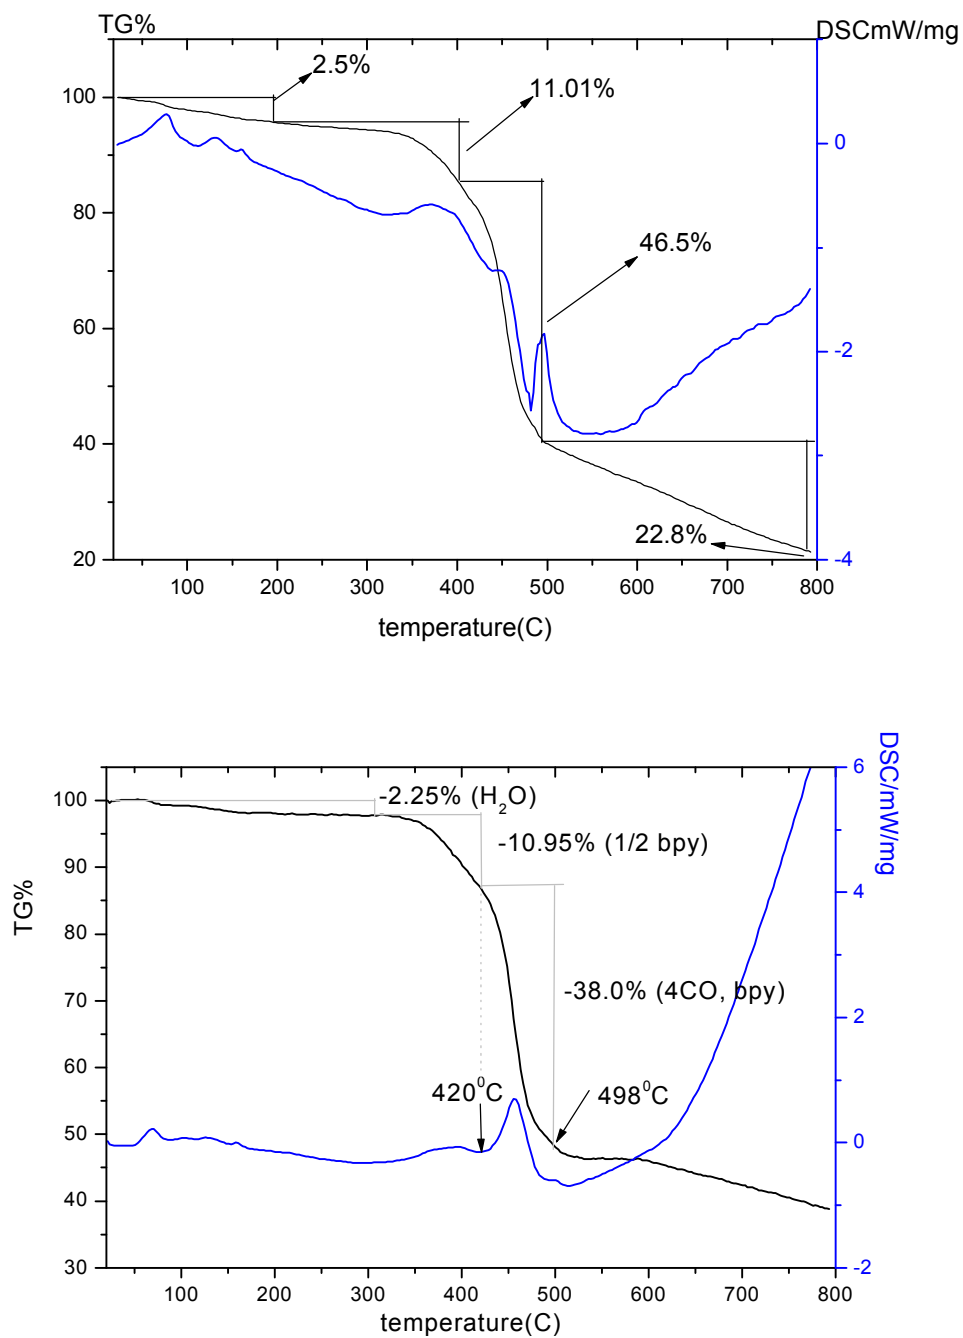

Fig. s4. TG of  $\{[\text{Zn}_2(2,4\text{-bptc})(2,2'\text{-bpy})]\cdot(2,2'\text{-bpy})_{0.5}\cdot(\text{H}_2\text{O})\}_n$  (**3**) in air (top) and nitrogen (bottom)

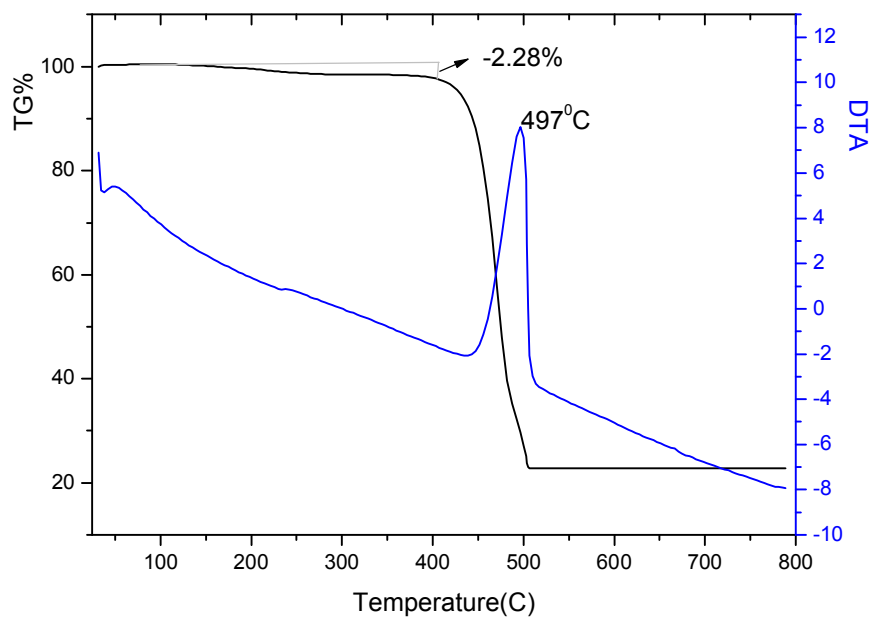

Fig. s5. TG curve of Complex  $\{[\text{Zn}_2(2,4\text{-bptc})(2,2'\text{-bpy})_2](\text{H}_2\text{O})\}_n$  (**4**)

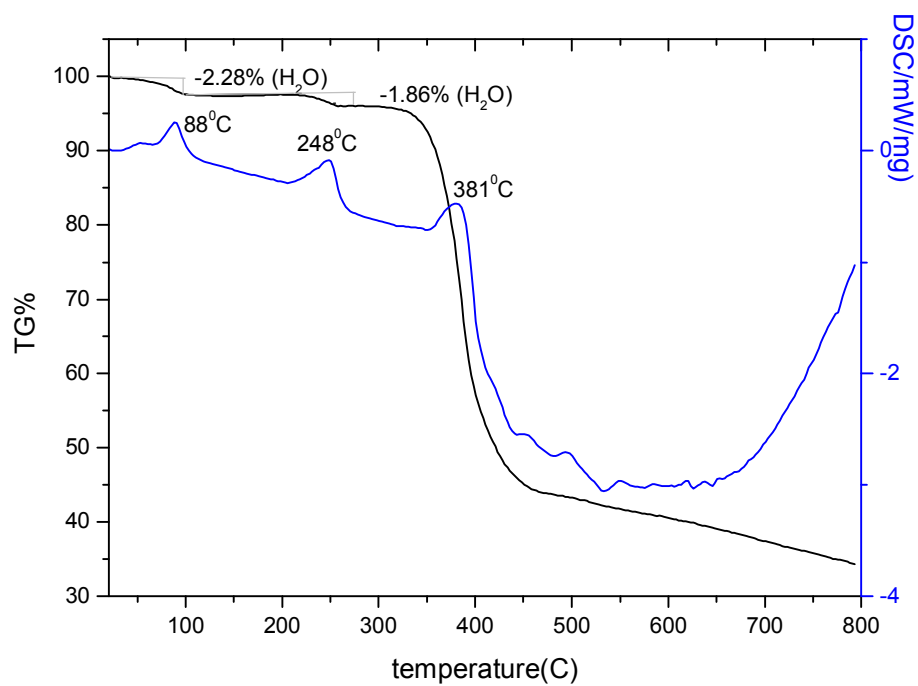

Fig. S6. TG curve of  $\{[\text{Cd}_2(2,4\text{-bptc})(2,2\text{-bpy})_2\cdot\text{H}_2\text{O}]\cdot\text{H}_2\text{O}\}_n$  (5)

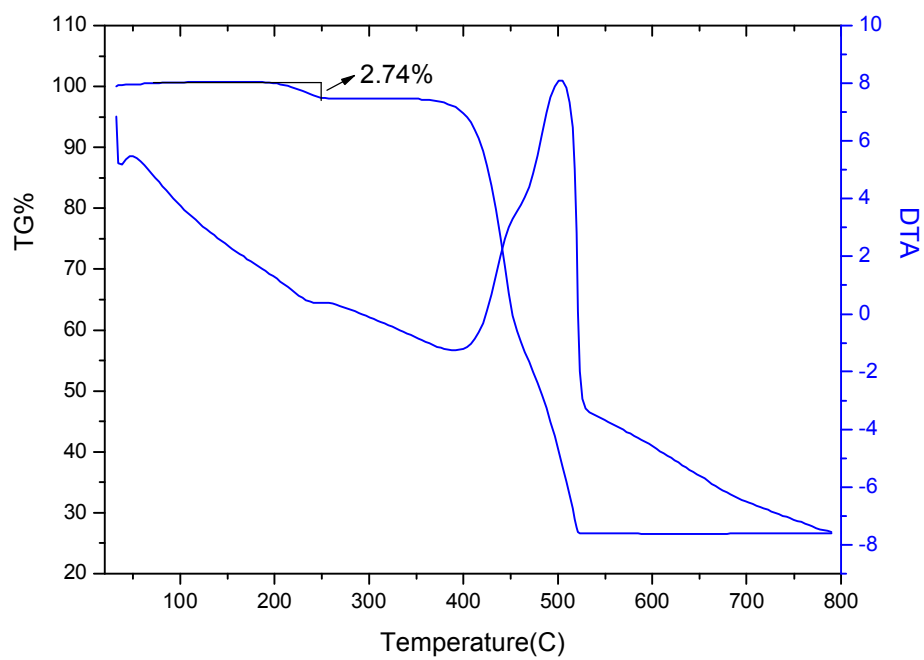

Fig. s7. TG curve of  $\{[Zn_2 \cdot (2,4\text{-bptc}) \cdot (\text{phen}) \cdot H_2O]_n\}_3$  (**6**)



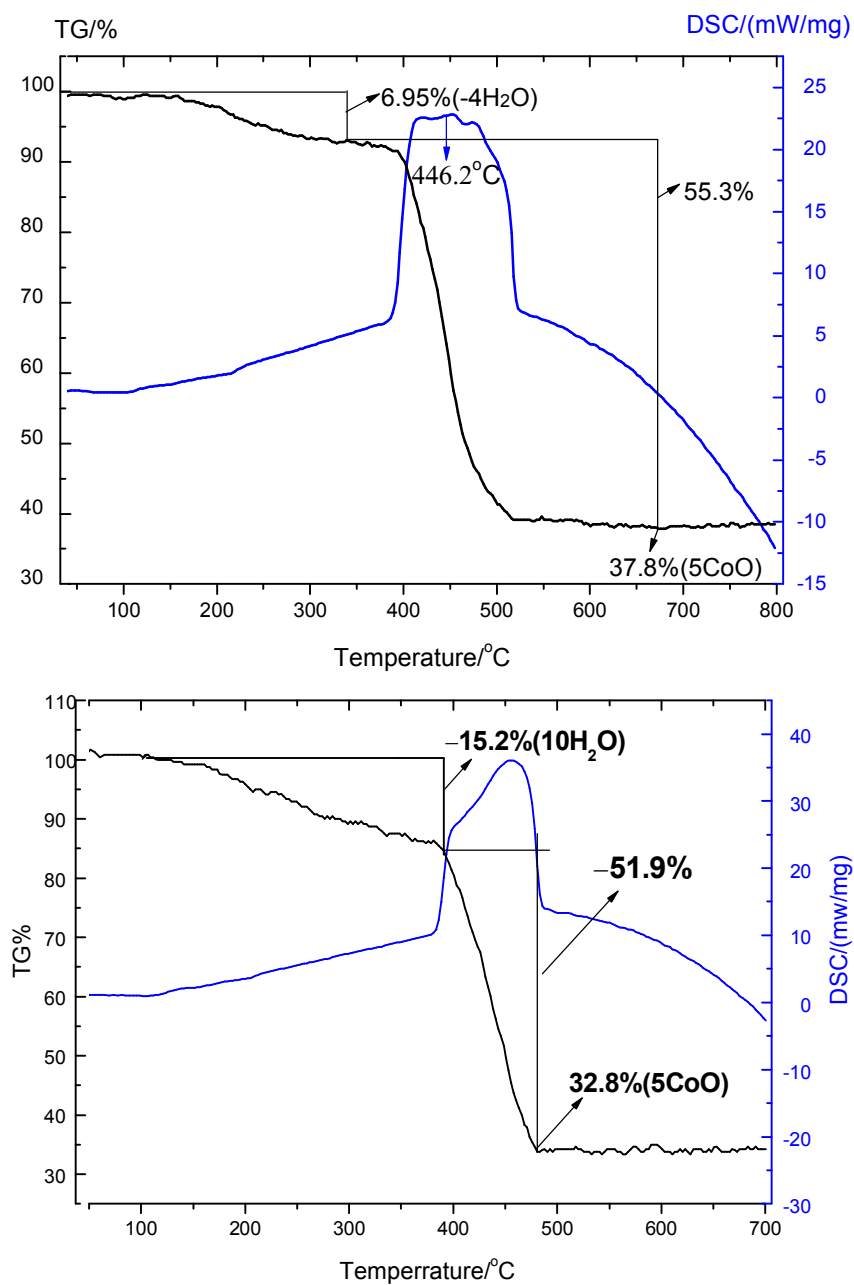

Fig. s8. TG of  $\{[\text{Co}_5(2,4\text{-bptc})_2(\mu_3\text{-OH})_2(\mu_2\text{-H}_2\text{O})_2(\mu_1\text{-H}_2\text{O})_2]\cdot 2\text{H}_2\text{O}\}_n^3$  (7) and  $\{[\text{Co}_5(2,4\text{-bptc})_2(\mu_3\text{-OH})(\mu_2\text{-H}_2\text{O})_2(\mu_1\text{-H}_2\text{O})_2]\cdot 6\text{H}_2\text{O}\}_n^3$  (8).

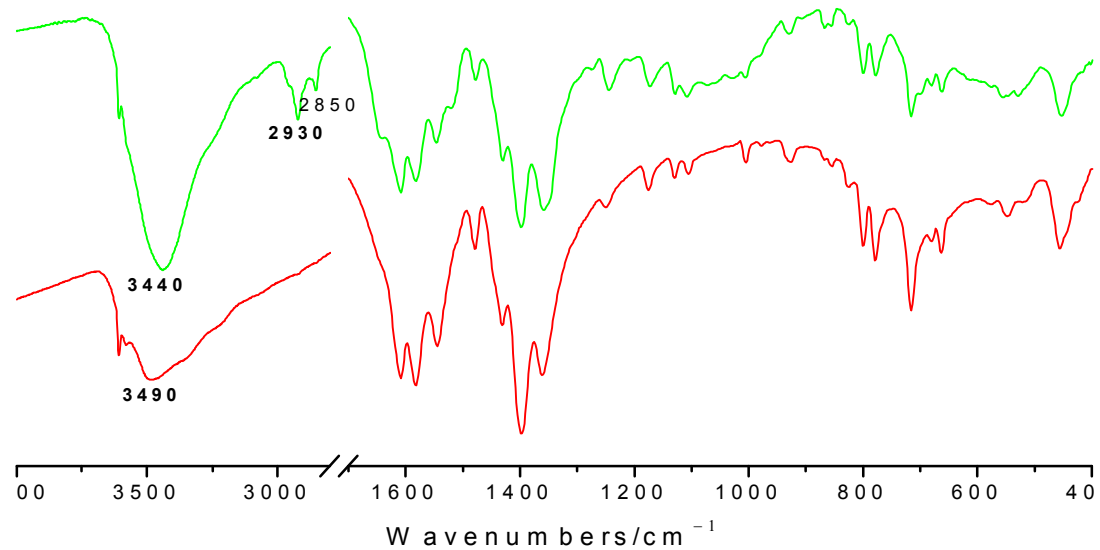

Fig. s9. IR of  $\{[\text{Co}_5(2,4\text{-bptc})_2(\mu_3\text{-OH})(\mu_2\text{-H}_2\text{O})_2(\mu_1\text{-H}_2\text{O})_2]\cdot 6\text{H}_2\text{O}\}_n^3$  (**8**) (red) and ethanol adsorbed dehydrated sample of **8** (blue)

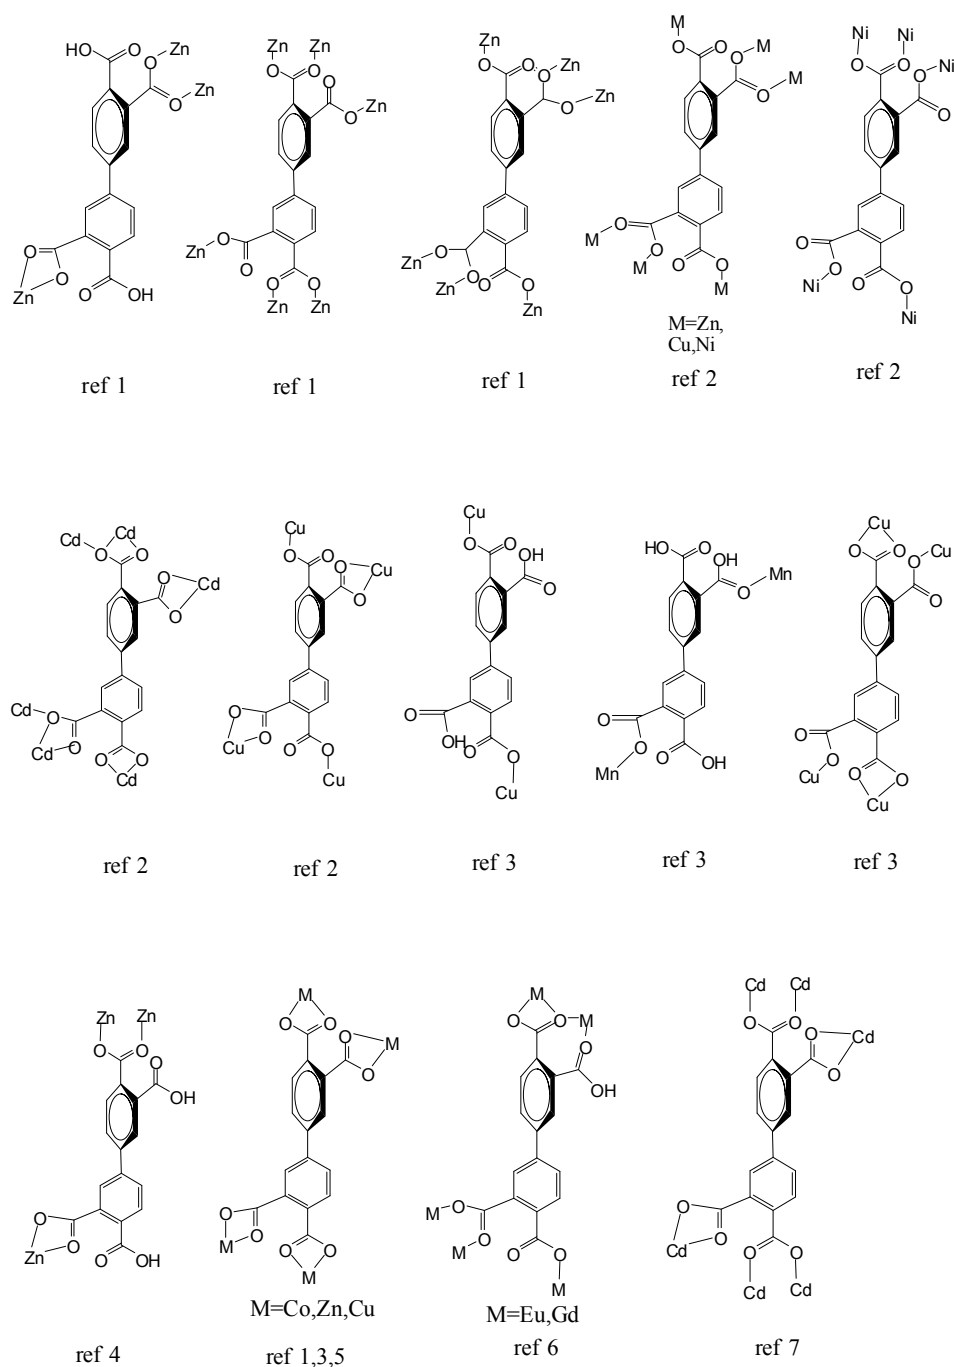

Scheme s1. Coordination mode of 3,4-bptc<sup>4-</sup> complexes

1. Ji-Jiang Wang, Lei Gou, et al, *Crystal Growth & Design*, 2007, **7**, 1514-1521.
2. Shourong Zhu, Hui Zhang et al, *Transition Met Chem* 2008, **33**, 669–680.
3. Guo-Ping Yang, Yao-Yu Wang et al, *Eur. J. Inorg. Chem.* 2007, 3892–3898.
4. Xin-Long Wang, Chao Qin, et al, *Eur. J. Inorg. Chem.* 2005, 3418–3421.
5. Li-Xin Sun, Yan Qi, et al, *Crystal Growth & Design*, 2009, **9**, 2995-2998.
6. Danfeng Weng, Xiangjun Zheng, et al, *Dalton Trans.*, 2007, 4822–4828.
7. Ji-Jiang Wang, Meng-Lin Yang et al, *Z. Anorg. Allg. Chem.* 2007, 341-345

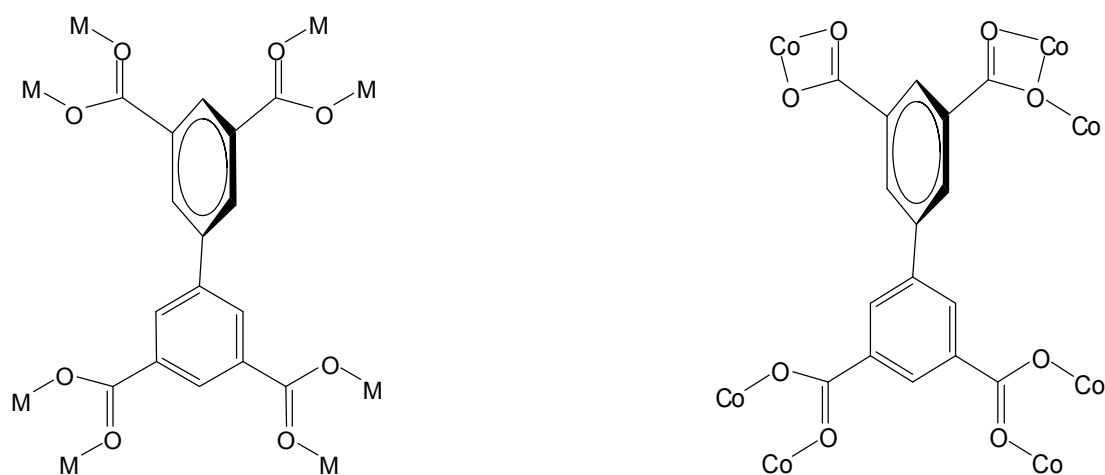

Scheme s2 Coordination mode of 3,5-bptc<sup>4-</sup> complexes

- 
1. Banglin Chen, Nathan W. Ockwig, et al, *Inorg. Chem.*, 2005, **44**, 181-183.
  2. Banglin Chen, Nathan W. Ockwig, et al, *Angew. Chem. Int. Ed.* 2005, **44**, 4745–4749
  3. Xiang Lin, Irvin Telepeni et al, *J. Am. Chem. Soc.* 2009, **131**, 2159–2171
-

Table S1. Selected bond length [Å] and angle [°] of complex **1**

|                    |            |                   |            |
|--------------------|------------|-------------------|------------|
| Zn(1)-O(1)         | 1.978(2)   | Zn(1)-O(4)#1      | 2.015(3)   |
| Zn(1)-N(1)         | 2.103(3)   | Zn(1)-O(1W)       | 2.104(3)   |
| Zn(1)-N(2)         | 2.129(3)   |                   |            |
| O(1)-Zn(1)-O(4)#1  | 108.32(11) | O(1)-Zn(1)-N(1)   | 111.83(12) |
| O(4)#1-Zn(1)-N(1)  | 138.66(12) | O(1)-Zn(1)-O(1W)  | 91.69(11)  |
| O(4)#1-Zn(1)-O(1W) | 95.37(12)  | N(1)-Zn(1)-O(1W)  | 92.90(13)  |
| O(1)-Zn(1)-N(2)    | 96.22(11)  | O(4)#1-Zn(1)-N(2) | 89.18(12)  |
| N(1)-Zn(1)-N(2)    | 77.29(13)  | O(1W)-Zn(1)-N(2)  | 169.16(12) |

Symmetry transformations used to generate equivalent atoms:

#1  $x-1/2, -y+1/2, z+1/2$  #2  $x+1/2, -y+1/2, z-1/2$

Table S2. Hydrogen bonds for **1** [Å and °].

| D-H...A               | d(D-H)  | d(H...A) | d(D...A) | <(DHA) |
|-----------------------|---------|----------|----------|--------|
| O(6)-H(6A)...O(3)#3   | 0.82    | 1.77     | 2.566(4) | 163.6  |
| O(7)-H(7)...O(5)#4    | 0.82    | 2.23     | 2.856(5) | 134.0  |
| O(7)-H(7)...O(1)#4    | 0.82    | 2.67     | 3.268(6) | 131.1  |
| O(1W)-H(1WA)...O(2)   | 0.82    | 1.87     | 2.590(4) | 146.3  |
| O(1W)-H(1WB)...O(5)#5 | 0.89(5) | 1.98(5)  | 2.830(4) | 159(4) |

Symmetry transformations used to generate equivalent atoms:

#1  $x-1/2, -y+1/2, z+1/2$  #2  $x+1/2, -y+1/2, z-1/2$

#3  $x+1/2, -y+1/2, z+1/2$  #4  $-x+1/2, y-1/2, -z+3/2$

#5  $x-1, y, z$

Table s3. Selected bond length [Å] and angle [°] of complex **2**.

|                      |            |                      |            |
|----------------------|------------|----------------------|------------|
| Zn(1)-O(3)#1         | 2.004(3)   | Zn(1)-O(5)#2         | 2.008(3)   |
| Zn(1)-N(2)           | 2.046(4)   | Zn(1)-O(1)           | 2.055(3)   |
| Zn(1)-N(1)           | 2.125(4)   | Zn(2)-O(4)#3         | 2.019(3)   |
| Zn(2)-O(4)#1         | 2.019(3)   | Zn(2)-O(5)#2         | 2.171(3)   |
| Zn(2)-O(5)           | 2.171(3)   | Zn(2)-O(1)#2         | 2.196(3)   |
| Zn(2)-O(1)           | 2.196(3)   | Zn(2)-Zn(1)#2        | 3.1226(7)  |
| O(3)#1-Zn(1)-O(5)#2  | 90.35(13)  | O(3)#1-Zn(1)-N(2)    | 95.23(15)  |
| O(5)#2-Zn(1)-N(2)    | 141.06(15) | O(3)#1-Zn(1)-O(1)    | 93.81(13)  |
| O(5)#2-Zn(1)-O(1)    | 84.54(13)  | N(2)-Zn(1)-O(1)      | 133.20(15) |
| O(3)#1-Zn(1)-N(1)    | 173.09(15) | O(5)#2-Zn(1)-N(1)    | 95.61(15)  |
| N(2)-Zn(1)-N(1)      | 77.93(16)  | O(1)-Zn(1)-N(1)      | 90.23(14)  |
| O(4)#3-Zn(2)-O(4)#1  | 180        | O(4)#3-Zn(2)-O(5)#2  | 89.92(12)  |
| O(4)#1-Zn(2)-O(5)#2  | 90.08(12)  | O(4)#3-Zn(2)-O(5)    | 90.08(12)  |
| O(4)#1-Zn(2)-O(5)    | 89.92(12)  | O(5)#2-Zn(2)-O(5)    | 180        |
| O(4)#3-Zn(2)-O(1)#2  | 87.24(12)  | O(4)#1-Zn(2)-O(1)#2  | 92.76(12)  |
| O(5)#2-Zn(2)-O(1)#2  | 102.49(12) | O(5)-Zn(2)-O(1)#2    | 77.51(12)  |
| O(4)#3-Zn(2)-O(1)    | 92.76(12)  | O(4)#1-Zn(2)-O(1)    | 87.23(12)  |
| O(5)#2-Zn(2)-O(1)    | 77.51(12)  | O(5)-Zn(2)-O(1)      | 102.49(12) |
| O(1)#2-Zn(2)-O(1)    | 180        | O(4)#3-Zn(2)-Zn(1)#2 | 76.05(9)   |
| O(4)#1-Zn(2)-Zn(1)#2 | 103.95(9)  | O(5)#2-Zn(2)-Zn(1)#2 | 140.30(8)  |
| O(5)-Zn(2)-Zn(1)#2   | 39.70(8)   | O(1)#2-Zn(2)-Zn(1)#2 | 41.01(8)   |
| O(1)-Zn(2)-Zn(1)#2   | 138.99(8)  |                      |            |

Symmetry transformations used to generate equivalent atoms:

#1  $x-1, y, z$  #2  $-x+1, -y+1, -z+1$  #3  $-x+2, -y+1, -z+1$   
 #4  $x+1, y, z$

Table s4. Selected bond length [Å] and angle [°] of complex **3**.

|                     |            |                     |            |
|---------------------|------------|---------------------|------------|
| Zn(1)-O(2)#1        | 1.936(2)   | Zn(1)-O(3)#2        | 1.940(2)   |
| Zn(1)-O(7)          | 1.979(2)   | Zn(1)-O(6)#3        | 2.031(2)   |
| Zn(1)-O(8)          | 2.412(3)   | Zn(2)-O(5)#4        | 1.993(3)   |
| Zn(2)-O(1)          | 2.033(2)   | Zn(2)-O(4)#5        | 2.042(3)   |
| Zn(2)-N(2)          | 2.098(3)   | Zn(2)-N(1)          | 2.146(3)   |
| O(2)#1-Zn(1)-O(3)#2 | 116.28(11) | O(2)#1-Zn(1)-O(7)   | 113.02(12) |
| O(3)#2-Zn(1)-O(7)   | 123.76(11) | O(2)#1-Zn(1)-O(6)#3 | 105.49(11) |
| O(3)#2-Zn(1)-O(6)#3 | 97.29(11)  | O(7)-Zn(1)-O(6)#3   | 94.15(11)  |
| O(2)#1-Zn(1)-O(8)   | 93.57(12)  | O(3)#2-Zn(1)-O(8)   | 92.68(11)  |
| O(7)-Zn(1)-O(8)     | 58.58(10)  | O(6)#3-Zn(1)-O(8)   | 151.61(10) |
| O(5)#4-Zn(2)-O(1)   | 96.14(11)  | O(5)#4-Zn(2)-O(4)#5 | 125.96(10) |
| O(1)-Zn(2)-O(4)#5   | 95.25(11)  | O(5)#4-Zn(2)-N(2)   | 107.33(12) |
| O(1)-Zn(2)-N(2)     | 90.61(12)  | O(4)#5-Zn(2)-N(2)   | 125.17(12) |
| O(5)#4-Zn(2)-N(1)   | 95.49(12)  | O(1)-Zn(2)-N(1)     | 164.95(12) |
| O(4)#5-Zn(2)-N(1)   | 85.58(12)  | N(2)-Zn(2)-N(1)     | 76.80(14)  |

Symmetry transformations used to generate equivalent atoms:

- #1  $x-1/2, -y+1/2, z-1/2$     #2  $-x+2, -y, -z$   
 #3  $-x+1, -y, -z$     #4  $-x+3/2, y+1/2, -z+1/2$   
 #5  $-x+5/2, y+1/2, -z+1/2$     #6  $-x, -y, -z+1$   
 #7  $x+1/2, -y+1/2, z+1/2$     #8  $-x+5/2, y-1/2, -z+1/2$   
 #9  $-x+3/2, y-1/2, -z+1/2$

Table s5. Selected bond length [Å] and angle [°] of complex 4

|                     |            |                     |           |
|---------------------|------------|---------------------|-----------|
| Zn(1)-O(3)#1        | 1.959(2)   | Zn(1)-O(5)          | 1.998(2)  |
| Zn(1)-O(1)#2        | 2.086(2)   | Zn(1)-N(2)          | 2.120(3)  |
| Zn(1)-N(1)          | 2.126(2)   | Zn(2)-O(8)#3        | 1.967(2)  |
| Zn(2)-O(2)#2        | 2.014(2)   | Zn(2)-O(6)          | 2.088(2)  |
| Zn(2)-N(3)          | 2.099(3)   | Zn(2)-N(4)          | 2.131(3)  |
| O(3)#1-Zn(1)-O(5)   | 110.41(9)  | O(3)#1-Zn(1)-O(1)#2 | 95.59(8)  |
| O(5)-Zn(1)-O(1)#2   | 90.08(9)   | O(3)#1-Zn(1)-N(2)   | 101.54(9) |
| O(5)-Zn(1)-N(2)     | 148.03(9)  | O(1)#2-Zn(1)-N(2)   | 87.72(9)  |
| O(3)#1-Zn(1)-N(1)   | 111.97(9)  | O(5)-Zn(1)-N(1)     | 90.84(10) |
| O(1)#2-Zn(1)-N(1)   | 150.12(9)  | N(2)-Zn(1)-N(1)     | 76.01(10) |
| O(8)#3-Zn(2)-O(2)#2 | 96.82(9)   | O(8)#3-Zn(2)-O(6)   | 104.76(9) |
| O(2)#2-Zn(2)-O(6)   | 86.55(9)   | O(8)#3-Zn(2)-N(3)   | 108.19(9) |
| O(2)#2-Zn(2)-N(3)   | 154.99(9)  | O(6)-Zn(2)-N(3)     | 87.33(10) |
| O(8)#3-Zn(2)-N(4)   | 102.41(10) | O(2)#2-Zn(2)-N(4)   | 98.03(10) |
| O(6)-Zn(2)-N(4)     | 151.70(9)  | N(3)-Zn(2)-N(4)     | 76.73(10) |

Symmetry transformations used to generate equivalent atoms:

- #1  $-x, y+1/2, -z+1/2$  #2  $x, -y+1/2, z-1/2$   
#3  $-x+1, -y+1, -z+1$  #4  $x, -y+1/2, z+1/2$   
#5  $-x, y-1/2, -z+1/2$



Table s6. Selected bond length [Å] and angle [°] of complex **5**

|                     |            |                     |            |
|---------------------|------------|---------------------|------------|
| Cd(1)-O(8)#1        | 2.274(3)   | Cd(1)-O(1)          | 2.328(3)   |
| Cd(1)-N(2)          | 2.332(4)   | Cd(1)-N(1)          | 2.363(3)   |
| Cd(1)-O(6)#2        | 2.361(4)   | Cd(1)-O(5)#2        | 2.516(3)   |
| Cd(1)-O(7)#1        | 2.577(3)   | Cd(2)-O(2)          | 2.216(3)   |
| Cd(2)-O(1W)         | 2.229(3)   | Cd(2)-O(3)#3        | 2.285(3)   |
| Cd(2)-N(3)          | 2.314(4)   | Cd(2)-N(4)          | 2.352(4)   |
| Cd(2)-O(4)#3        | 2.455(3)   |                     |            |
| O(8)#1-Cd(1)-O(1)   | 90.43(13)  | O(8)#1-Cd(1)-N(2)   | 132.76(13) |
| O(1)-Cd(1)-N(2)     | 127.93(13) | O(8)#1-Cd(1)-N(1)   | 96.51(14)  |
| O(1)-Cd(1)-N(1)     | 79.60(13)  | N(2)-Cd(1)-N(1)     | 69.51(13)  |
| O(8)#1-Cd(1)-O(6)#2 | 91.60(13)  | O(1)-Cd(1)-O(6)#2   | 111.07(14) |
| N(2)-Cd(1)-O(6)#2   | 97.18(14)  | N(1)-Cd(1)-O(6)#2   | 166.61(14) |
| O(8)#1-Cd(1)-O(5)#2 | 133.33(12) | O(1)-Cd(1)-O(5)#2   | 78.24(13)  |
| N(2)-Cd(1)-O(5)#2   | 86.14(13)  | N(1)-Cd(1)-O(5)#2   | 124.78(13) |
| O(6)#2-Cd(1)-O(5)#2 | 53.11(12)  | O(8)#1-Cd(1)-O(7)#1 | 53.30(12)  |
| O(1)-Cd(1)-O(7)#1   | 139.98(13) | N(2)-Cd(1)-O(7)#1   | 80.50(12)  |
| N(1)-Cd(1)-O(7)#1   | 87.64(13)  | O(6)#2-Cd(1)-O(7)#1 | 88.70(13)  |
| O(5)#2-Cd(1)-O(7)#1 | 137.50(12) | O(2)-Cd(2)-O(1W)    | 86.15(13)  |
| O(2)-Cd(2)-O(3)#3   | 139.02(12) | O(1W)-Cd(2)-O(3)#3  | 93.59(13)  |
| O(2)-Cd(2)-N(3)     | 87.50(14)  | O(1W)-Cd(2)-N(3)    | 152.32(16) |
| O(3)#3-Cd(2)-N(3)   | 108.62(13) | O(2)-Cd(2)-N(4)     | 129.53(14) |
| O(1W)-Cd(2)-N(4)    | 93.26(16)  | O(3)#3-Cd(2)-N(4)   | 91.42(14)  |
| N(3)-Cd(2)-N(4)     | 70.49(16)  | O(2)-Cd(2)-O(4)#3   | 89.65(12)  |
| O(1W)-Cd(2)-O(4)#3  | 118.78(14) | O(3)#3-Cd(2)-O(4)#3 | 54.89(10)  |
| N(3)-Cd(2)-O(4)#3   | 88.07(14)  | N(4)-Cd(2)-O(4)#3   | 132.25(14) |

Symmetry transformations used to generate equivalent atoms:

- #1  $-x+3/2, y+1/2, -z+3/2$  #2  $x-1, y, z$   
 #3  $-x+1, -y+1, -z+1$  #4  $-x+3/2, y-1/2, -z+3/2$   
 #5  $x+1, y, z$

Table s7. Hydrogen bonds for complex **5**

| D-H...A               | d(D-H) | d(H...A) | d(D...A) | <(DHA) |
|-----------------------|--------|----------|----------|--------|
| O(1W)-H(1WB)...O(3)#2 | 0.85   | 1.84     | 2.667(5) | 163.1  |
| O(1W)-H(1WA)...O(5)#2 | 0.85   | 1.97     | 2.682(5) | 140.5  |

Symmetry transformations used to generate equivalent atoms:

- #1  $-x+3/2, y+1/2, -z+3/2$  #2  $x-1, y, z$  #3  $-x+1, -y+1, -z+1$   
 #4  $-x+3/2, y-1/2, -z+3/2$  #5  $x+1, y, z$

Table s8. Selected bond length [Å] and angle [°] of complex **6**

|                     |            |                    |            |
|---------------------|------------|--------------------|------------|
| Zn(1)-O(1)          | 1.9808(18) | Zn(1)-N(1)         | 2.045(2)   |
| Zn(1)-O(4)#1        | 2.063(2)   | Zn(1)-N(2)         | 2.084(2)   |
| Zn(1)-O(3)#1        | 2.1861(18) | Zn(1)-C(20)#1      | 2.448(3)   |
| Zn(2)-O(7)#2        | 2.0102(17) | Zn(2)-O(8)#3       | 2.0349(16) |
| Zn(2)-O(2)          | 2.0514(18) | Zn(2)-O(1W)        | 2.100(2)   |
| Zn(2)-O(5)          | 2.1110(18) | Zn(2)-Zn(2)#4      | 3.1462(7)  |
| O(1)-Zn(1)-N(1)     | 106.37(8)  | O(1)-Zn(1)-O(4)#1  | 111.86(8)  |
| N(1)-Zn(1)-O(4)#1   | 140.85(9)  | O(1)-Zn(1)-N(2)    | 96.92(8)   |
| N(1)-Zn(1)-N(2)     | 81.16(9)   | O(4)#1-Zn(1)-N(2)  | 101.88(8)  |
| O(1)-Zn(1)-O(3)#1   | 109.07(7)  | N(1)-Zn(1)-O(3)#1  | 98.21(8)   |
| O(4)#1-Zn(1)-O(3)#1 | 61.79(7)   | N(2)-Zn(1)-O(3)#1  | 152.90(8)  |
| O(1)-Zn(1)-C(20)#1  | 112.65(8)  | N(1)-Zn(1)-C(20)#1 | 123.19(9)  |
| O(7)#2-Zn(2)-O(8)#3 | 153.59(7)  | O(7)#2-Zn(2)-O(2)  | 106.37(7)  |
| O(8)#3-Zn(2)-O(2)   | 99.87(7)   | O(7)#2-Zn(2)-O(1W) | 92.27(8)   |
| O(8)#3-Zn(2)-O(1W)  | 94.16(7)   | O(2)-Zn(2)-O(1W)   | 82.33(8)   |
| O(7)#2-Zn(2)-O(5)   | 86.02(7)   | O(8)#3-Zn(2)-O(5)  | 84.69(7)   |
| O(2)-Zn(2)-O(5)     | 104.22(7)  | O(1W)-Zn(2)-O(5)   | 173.44(7)  |

Symmetry transformations used to generate equivalent atoms:

- #1  $-x-1/2, y-1/2, -z+1/2$     #2  $-x+1, -y, -z+1$   
 #3  $x-1, y, z$     #4  $-x, -y, -z+1$     #5  $-x-1/2, y+1/2, -z+1/2$   
 #6  $x+1, y, z$

Table s9. Hydrogen bonds for complex **6** [Å and deg.].

| D-H...A               | d(D-H)  | d(H...A) | d(D...A) | <(DHA) |
|-----------------------|---------|----------|----------|--------|
| O(1W)-H(1WA)...O(3)#1 | 0.86(4) | 2.01(4)  | 2.851(3) | 167(3) |
| O(1W)-H(1WB)...O(5)#4 | 0.82    | 2.52     | 2.935(3) | 112.6  |
| O(1W)-H(1WB)...O(6)#4 | 0.82    | 1.86     | 2.667(3) | 169.1  |

Symmetry transformations used to generate equivalent atoms:

- #1  $-x-1/2, y-1/2, -z+1/2$     #2  $-x+1, -y, -z+1$     #3  $x-1, y, z$   
 #4  $-x, -y, -z+1$     #5  $-x-1/2, y+1/2, -z+1/2$     #6  $x+1, y, z$

Table s10. Selected bond length [Å] and angle [°] of complex 7

|                      |            |                      |            |
|----------------------|------------|----------------------|------------|
| Co(1)-O(4)#1         | 2.073(4)   | Co(1)-O(4)#2         | 2.073(4)   |
| Co(1)-O(5)#3         | 2.142(4)   | Co(1)-O(5)           | 2.142(4)   |
| Co(1)-O(1)           | 2.292(4)   | Co(1)-O(1)#3         | 2.292(4)   |
| Co(2)-O(3)#2         | 2.028(4)   | Co(2)-O(7)#4         | 2.042(5)   |
| Co(2)-O(1W)          | 2.045(4)   | Co(2)-O(5)#3         | 2.104(4)   |
| Co(2)-O(1)           | 2.121(4)   | Co(2)-O(2W)#5        | 2.322(4)   |
| Co(3)-O(2)#5         | 2.049(5)   | Co(3)-O(1W)#5        | 2.086(4)   |
| Co(3)-O(3W)          | 2.086(4)   | Co(3)-O(8)#4         | 2.104(4)   |
| Co(3)-O(1W)          | 2.108(4)   | Co(3)-O(2W)          | 2.197(4)   |
| O(4)#1-Co(1)-O(4)#2  | 180.0      | O(4)#1-Co(1)-O(5)    | 92.27(16)  |
| O(4)#2-Co(1)-O(5)    | 87.73(16)  | O(4)#1-Co(1)-O(5)#3  | 87.73(16)  |
| O(4)#2-Co(1)-O(5)#3  | 92.27(16)  | O(5)-Co(1)-O(5)#3    | 180.0      |
| O(4)#1-Co(1)-O(1)#3  | 94.98(15)  | O(4)#2-Co(1)-O(1)#3  | 85.02(15)  |
| O(5)-Co(1)-O(1)#3    | 73.31(15)  | O(5)#3-Co(1)-O(1)#3  | 106.69(15) |
| O(4)#1-Co(1)-O(1)    | 85.02(15)  | O(4)#2-Co(1)-O(1)    | 94.98(15)  |
| O(5)-Co(1)-O(1)      | 106.69(15) | O(5)#3-Co(1)-O(1)    | 73.31(15)  |
| O(1)#3-Co(1)-O(1)    | 180.0      | O(3)#2-Co(2)-O(7)#4  | 87.89(19)  |
| O(3)#2-Co(2)-O(1W)   | 95.78(17)  | O(7)#4-Co(2)-O(1W)   | 97.98(17)  |
| O(3)#2-Co(2)-O(5)#3  | 92.57(16)  | O(7)#4-Co(2)-O(5)#3  | 88.79(17)  |
| O(1W)-Co(2)-O(5)#3   | 169.41(16) | O(3)#2-Co(2)-O(1)    | 87.07(17)  |
| O(7)#4-Co(2)-O(1)    | 165.32(17) | O(1W)-Co(2)-O(1)     | 96.23(16)  |
| O(5)#3-Co(2)-O(1)    | 77.68(16)  | O(3)#2-Co(2)-O(2W)#5 | 170.74(17) |
| O(7)#4-Co(2)-O(2W)#5 | 88.78(17)  | O(1W)-Co(2)-O(2W)#5  | 76.13(15)  |
| O(5)#3-Co(2)-O(2W)#5 | 96.00(15)  | O(1)-Co(2)-O(2W)#5   | 98.18(16)  |
| O(2)#5-Co(3)-O(3W)   | 86.00(19)  | O(2)#5-Co(3)-O(1W)#5 | 97.91(17)  |
| O(3W)-Co(3)-O(1W)#5  | 170.48(18) | O(2)#5-Co(3)-O(8)#4  | 91.27(19)  |
| O(3W)-Co(3)-O(8)#4   | 99.79(19)  | O(1W)#5-Co(3)-O(8)#4 | 88.83(17)  |
| O(2)#5-Co(3)-O(1W)   | 177.42(18) | O(3W)-Co(3)-O(1W)    | 91.63(17)  |
| O(1W)#5-Co(3)-O(1W)  | 84.26(16)  | O(8)#4-Co(3)-O(1W)   | 90.16(17)  |
| O(2)#5-Co(3)-O(2W)   | 91.76(18)  | O(3W)-Co(3)-O(2W)    | 93.11(18)  |
| O(1W)#5-Co(3)-O(2W)  | 78.16(16)  | O(8)#4-Co(3)-O(2W)   | 166.92(18) |
| O(1W)-Co(3)-O(2W)    | 87.32(16)  |                      |            |

Symmetry transformations used to generate equivalent atoms:

- #1 -x+1,-y,-z+2 #2 x+1,y,z #3 -x+2,-y,-z+2  
 #4 -x+5/2,y-1/2,-z+3/2 #5 -x+2,-y,-z+1  
 #6 x-1,y,z #7 -x+5/2,y+1/2,-z+3/2

Table s11. Selected bond length [Å] and angle [°] of complex **8**

|                      |            |                      |            |
|----------------------|------------|----------------------|------------|
| Co(1)-O(7)#1         | 2.012(3)   | Co(1)-O(2W)#2        | 2.060(3)   |
| Co(1)-O(1)           | 2.065(3)   | Co(1)-O(4)#3         | 2.107(3)   |
| Co(1)-O(5)#4         | 2.121(3)   | Co(1)-O(1W)          | 2.300(3)   |
| Co(2)-O(8)#5         | 2.013(3)   | Co(2)-O(8)#6         | 2.013(3)   |
| Co(2)-O(5)           | 2.168(3)   | Co(2)-O(5)#7         | 2.168(3)   |
| Co(2)-O(4)           | 2.194(3)   | Co(2)-O(4)#7         | 2.194(3)   |
| Co(3)-O(2)           | 2.038(3)   | Co(3)-O(2W)          | 2.056(3)   |
| Co(3)-O(6)#8         | 2.104(3)   | Co(3)-O(2W)#2        | 2.116(3)   |
| Co(3)-O(3W)          | 2.140(4)   | Co(3)-O(1W)          | 2.176(3)   |
| O(7)#1-Co(1)-O(2W)#2 | 98.95(12)  | O(7)#1-Co(1)-O(1)    | 86.99(13)  |
| O(2W)#2-Co(1)-O(1)   | 91.22(12)  | O(7)#1-Co(1)-O(4)#3  | 91.13(12)  |
| O(2W)#2-Co(1)-O(4)#3 | 169.91(12) | O(1)-Co(1)-O(4)#3    | 88.95(12)  |
| O(7)#1-Co(1)-O(5)#4  | 88.85(12)  | O(2W)#2-Co(1)-O(5)#4 | 101.96(11) |
| O(1)-Co(1)-O(5)#4    | 166.65(12) | O(4)#3-Co(1)-O(5)#4  | 78.45(11)  |
| O(7)#1-Co(1)-O(1W)   | 176.73(13) | O(2W)#2-Co(1)-O(1W)  | 77.83(11)  |
| O(1)-Co(1)-O(1W)     | 93.59(12)  | O(4)#3-Co(1)-O(1W)   | 92.09(11)  |
| O(5)#4-Co(1)-O(1W)   | 91.29(11)  | O(8)#5-Co(2)-O(8)#6  | 180.0      |
| O(8)#5-Co(2)-O(5)    | 87.02(12)  | O(8)#6-Co(2)-O(5)    | 92.98(12)  |
| O(8)#5-Co(2)-O(5)#7  | 92.98(12)  | O(8)#6-Co(2)-O(5)#7  | 87.01(12)  |
| O(5)-Co(2)-O(5)#7    | 180.00(5)  | O(8)#5-Co(2)-O(4)    | 83.93(11)  |
| O(8)#6-Co(2)-O(4)    | 96.07(11)  | O(5)-Co(2)-O(4)      | 104.40(11) |
| O(5)#7-Co(2)-O(4)    | 75.60(11)  | O(8)#5-Co(2)-O(4)#7  | 96.07(11)  |
| O(8)#6-Co(2)-O(4)#7  | 83.93(11)  | O(5)-Co(2)-O(4)#7    | 75.60(11)  |
| O(5)#7-Co(2)-O(4)#7  | 104.40(11) | O(4)-Co(2)-O(4)#7    | 179.998(1) |
| O(2)-Co(3)-O(2W)     | 177.74(14) | O(2)-Co(3)-O(6)#8    | 85.21(13)  |
| O(2W)-Co(3)-O(6)#8   | 96.41(12)  | O(2)-Co(3)-O(2W)#2   | 98.59(12)  |
| O(2W)-Co(3)-O(2W)#2  | 82.83(12)  | O(6)#8-Co(3)-O(2W)#2 | 96.08(12)  |
| O(2)-Co(3)-O(3W)     | 85.07(15)  | O(2W)-Co(3)-O(3W)    | 93.34(14)  |
| O(6)#8-Co(3)-O(3W)   | 89.97(15)  | O(2W)#2-Co(3)-O(3W)  | 173.15(14) |
| O(2)-Co(3)-O(1W)     | 87.10(12)  | O(2W)-Co(3)-O(1W)    | 91.45(12)  |
| O(6)#8-Co(3)-O(1W)   | 170.46(13) | O(2W)#2-Co(3)-O(1W)  | 79.50(11)  |
| O(3W)-Co(3)-O(1W)    | 94.98(14)  |                      |            |

Symmetry transformations used to generate equivalent atoms:

- |                         |                        |                   |
|-------------------------|------------------------|-------------------|
| #1 -x+5/2,y-1/2,-z+3/2  | #2 -x+1,-y+1,-z+1      |                   |
| #3 x-1/2,-y+3/2,z+1/2   | #4 -x+3/2,y-1/2,-z+3/2 |                   |
| #5 x-1,y,z              | #6 -x+3,-y+2,-z+1      | #7 -x+2,-y+2,-z+1 |
| #8 x-1/2,-y+3/2,z-1/2   | #9 x+1/2,-y+3/2,z-1/2  |                   |
| #10 -x+3/2,y+1/2,-z+3/2 | #11 x+1/2,-y+3/2,z+1/2 |                   |
| #12 -x+5/2,y+1/2,-z+3/2 | #13 x+1,y,z            |                   |
